# Supplementary material for: Prevalence and Antimicrobial Resistances of Salmonella spp. Isolated from Wild Boars in Liguria Region, Italy
Source: MDPI journal article supplement (doi:10.3390/pathogens10050568), 2021-05-07
Supplement: s1 [file s1]

[illegible]

| n. | Lab cod.         | YEAR | SUBTYPE or SEROTYPE                              | A | AMC | C    | KF | CTX  | CIP | CST  | CAZ | ENR  | G | K    | NAL  | S | SSS  | SXT | T |
|----|------------------|------|--------------------------------------------------|---|-----|------|----|------|-----|------|-----|------|---|------|------|---|------|-----|---|
| 33 | 94516            | 2015 | S. Typhimurium                                   | I | S   | S    | S  | S    | S   | S    | S   | S    | S | I    | S    | I | R    | R   | I |
| 34 | 99713            | 2015 | S. Typhimurium                                   | I | S   | n.t. | S  | S    | S   | S    | S   | S    | S | S    | S    | S | R    | S   | S |
| 35 | 95927            | 2014 | S. Typhimurium                                   | S | S   | S    | I  | S    | S   | S    | S   | n.t. | S | n.t. | S    | S | R    | R   | I |
| 36 | 95437            | 2014 | S. Typhimurium monophasic variant 1,4,[5],12:I:- | R | R   | S    | R  | S    | S   | S    | S   | n.t. | S | n.t. | S    | R | R    | R   | R |
| 37 | 95438 CONF.4/1-2 | 2014 | S. Typhimurium monophasic variant 1,4,[5],12:I:- | R | R   | S    | R  | S    | S   | S    | S   | n.t. | S | n.t. | S    | R | R    | R   | R |
| 38 | 95752            | 2014 | S. Typhimurium monophasic variant 1,4,[5],12:I:- | R | R   | S    | R  | S    | S   | S    | S   | n.t. | S | n.t. | S    | R | n.t. | R   | R |
| 39 | 95445            | 2014 | S. Typhimurium monophasic variant 1,4,[5],12:I:- | R | R   | S    | I  | S    | S   | S    | S   | n.t. | S | n.t. | S    | R | R    | R   | R |
| 40 | 89846 CONF.4/1-2 | 2014 | S. Infantis                                      | S | S   | S    | I  | S    | S   | S    | I   | n.t. | S | n.t. | S    | S | R    | S   | I |
| 41 | 89847 CONF.3/1-2 | 2014 | S. Infantis                                      | S | S   | S    | S  | S    | S   | S    | I   | n.t. | S | n.t. | S    | S | R    | I   | R |
| 42 | 89848 CONF.3/1-2 | 2014 | S. Infantis                                      | S | S   | S    | R  | S    | S   | S    | I   | n.t. | S | n.t. | S    | S | R    | I   | I |
| 43 | 91737 CONF. 4/1  | 2013 | S. Newport                                       | S | S   | S    | S  | S    | S   | S    | S   | S    | S | I    | S    | R | R    | S   | I |
| 44 | 91737 CONF. 4/2  | 2013 | S. Newport                                       | S | S   | S    | S  | S    | S   | S    | S   | S    | S | I    | S    | R | R    | S   | I |
| 45 | 91737 CONF. 4/3  | 2013 | S. Newport                                       | S | S   | S    | S  | S    | S   | S    | S   | S    | S | I    | S    | R | R    | S   | I |
| 46 | 91737 CONF. 4/4  | 2013 | S. Newport                                       | S | S   | S    | S  | S    | S   | S    | S   | S    | S | I    | S    | R | R    | S   | I |
| 47 | 91737 CONF. 4/6  | 2013 | S. Newport                                       | S | S   | S    | S  | S    | S   | S    | S   | S    | S | I    | S    | R | R    | S   | I |
| 48 | 100063           | 2013 | S. Newport                                       | S | S   | S    | S  | S    | S   | S    | S   | S    | S | S    | S    | S | R    | S   | S |
| 49 | 5547             | 2014 | S. Newport                                       | S | S   | S    | S  | S    | S   | S    | S   | S    | S | S    | S    | S | R    | S   | S |
| 50 | 1613             | 2016 | S. Newport                                       | S | S   | S    | S  | S    | S   | S    | S   | S    | S | I    | S    | S | R    | R   | I |
| 51 | 98945            | 2013 | S. Napoli                                        | S | S   | S    | S  | S    | S   | S    | S   | S    | S | S    | S    | S | R    | S   | S |
| 52 | 99103            | 2013 | S. Napoli                                        | S | S   | S    | S  | S    | S   | S    | S   | S    | S | S    | S    | S | R    | S   | S |
| 53 | 103159 CONF.6/1  | 2013 | S. Napoli                                        | R | S   | n.t. | I  | S    | S   | S    | I   | S    | S | I    | n.t. | I | R    | S   | S |
| 54 | 103159 CONF.6/2  | 2013 | S. Napoli                                        | R | S   | n.t. | I  | S    | S   | S    | I   | S    | S | I    | n.t. | I | R    | S   | S |
| 55 | 103197           | 2013 | S. Napoli                                        | S | S   | S    | S  | S    | S   | S    | S   | S    | S | S    | S    | S | I    | S   | S |
| 56 | 92864            | 2013 | S. Napoli                                        | S | S   | S    | S  | S    | S   | S    | S   | S    | S | I    | S    | S | R    | S   | I |
| 57 | 100413           | 2013 | S. Napoli                                        | R | S   | S    | S  | S    | S   | S    | I   | S    | I | I    | S    | I | R    | S   | S |
| 58 | 91489            | 2013 | S. Napoli                                        | S | S   | S    | S  | S    | S   | n.t. | I   | S    | S | S    | S    | S | R    | S   | R |
| 59 | 93470            | 2013 | S. Napoli                                        | S | S   | S    | S  | n.t. | S   | n.t. | S   | S    | S | S    | S    | S | R    | S   | I |
| 60 | 100437           | 2013 | S. Napoli                                        | S | S   | S    | S  | S    | S   | S    | S   | S    | S | S    | S    | S | I    | S   | S |
| 61 | 109450           | 2013 | S. Napoli                                        | S | S   | S    | S  | S    | S   | S    | S   | S    | S | S    | S    | S | R    | S   | S |
| 62 | 109452           | 2013 | S. Napoli                                        | I | S   | S    | S  | S    | S   | S    | S   | S    | S | S    | S    | S | S    | S   | S |
| 63 | 111850           | 2013 | S. Napoli                                        | R | I   | S    | S  | I    | S   | S    | S   | S    | S | S    | S    | R | R    | S   | R |
| 64 | 108435           | 2013 | S. Napoli                                        | I | S   | S    | S  | S    | S   | S    | I   | S    | S | I    | S    | S | R    | S   | S |

[illegible]

| n.  | Lab cod.                | YEAR | SUBTYPE or SEROTYPE | A | AMC  | C    | KF | CTX | CIP | CST  | CAZ | ENR  | G | K    | NAL | S | SSS  | SXT | T |
|-----|-------------------------|------|---------------------|---|------|------|----|-----|-----|------|-----|------|---|------|-----|---|------|-----|---|
| 99  | 102745                  | 2013 | S. Muenster         | S | S    | S    | S  | S   | S   | S    | I   | S    | S | S    | S   | S | I    | S   | I |
| 100 | 90720                   | 2013 | S. Atkpace          | R | R    | S    | R  | I   | S   | n.t. | S   | n.t. | S | S    | S   | S | R    | R   | R |
| 101 | 93703                   | 2013 | S. Goldocast        | S | I    | S    | I  | I   | S   | S    | I   | I    | S | I    | S   | I | R    | S   | I |
| 102 | 93740                   | 2013 | S. Kottbus          | I | I    | S    | R  | I   | S   | I    | I   | S    | S | S    | I   | I | R    | S   | I |
| 103 | 108931                  | 2013 | S. Kottbus          | I | S    | S    | S  | S   | S   | S    | I   | S    | S | I    | S   | S | R    | S   | S |
| 104 | 108933                  | 2013 | S. Kottbus          | S | S    | S    | S  | S   | S   | S    | S   | S    | S | S    | S   | S | R    | S   | S |
| 105 | 99687 CONF.4/1-2        | 2015 | S. Kottbus          | I | S    | S    | S  | S   | S   | S    | S   | S    | S | I    | S   | S | R    | R   | S |
| 106 | 7378 conf. 10/1         | 2016 | S. Kottbus          | S | S    | S    | I  | S   | S   | S    | S   | I    | I | S    | S   | I | R    | I   | I |
| 107 | 100469                  | 2013 | S. Thompson         | S | S    | S    | S  | S   | S   | S    | S   | S    | S | S    | S   | S | S    | S   | S |
| 108 | 103912                  | 2013 | S. Thompson         | S | S    | S    | S  | S   | S   | S    | S   | S    | S | S    | S   | S | R    | S   | R |
| 109 | 100908                  | 2014 | S. Thompson         | S | S    | S    | S  | S   | S   | S    | S   | S    | S | S    | S   | I | n.t. | S   | S |
| 110 | 90437 CONF.4/2-4        | 2014 | S. Thompson         | S | I    | S    | I  | S   | S   | S    | I   | n.t. | S | n.t. | S   | R | R    | S   | R |
| 111 | 90437 CONF.4/ CAMP.3    | 2014 | S. Thompson         | S | S    | S    | S  | S   | S   | S    | I   | n.t. | S | n.t. | S   | I | R    | S   | R |
| 112 | 5791                    | 2014 | S. Thompson         | S | S    | S    | S  | S   | S   | S    | S   | S    | S | S    | S   | S | R    | S   | S |
| 113 | 5791                    | 2014 | S. Thompson         | S | S    | S    | S  | S   | S   | S    | S   | S    | S | S    | S   | S | R    | S   | S |
| 114 | 107000                  | 2015 | S. Thompson         | S | S    | S    | S  | S   | S   | S    | S   | S    | S | I    | S   | S | R    | I   | S |
| 115 | 90059 CONF.8/CAMP.2     | 2013 | S. Veneziana        | S | S    | n.t. | I  | S   | S   | n.t. | I   | S    | S | I    | S   | I | R    | R   | R |
| 116 | 89108                   | 2013 | S. Veneziana        | S | S    | S    | S  | S   | S   | n.t. | S   | S    | S | S    | S   | S | R    | S   | S |
| 117 | 103878                  | 2013 | S. Veneziana        | S | S    | S    | S  | S   | S   | S    | S   | S    | S | S    | S   | S | R    | S   | S |
| 118 | 103918                  | 2013 | S. Veneziana        | S | S    | S    | S  | S   | S   | S    | S   | S    | S | S    | S   | S | R    | S   | I |
| 119 | 2645                    | 2014 | S. Veneziana        | S | S    | S    | S  | S   | S   | S    | S   | S    | S | S    | S   | S | R    | S   | S |
| 120 | 107013                  | 2015 | S. Veneziana        | S | S    | S    | S  | S   | S   | S    | S   | S    | S | I    | S   | S | R    | S   | S |
| 121 | 7378 conf. 3/1          | 2016 | S. Veneziana        | S | I    | S    | S  | S   | S   | S    | S   | S    | I | S    | S   | S | R    | R   | R |
| 122 | 7378 conf. 3/2          | 2016 | S. Veneziana        | S | S    | S    | S  | S   | S   | S    | S   | S    | S | I    | S   | S | R    | I   | R |
| 123 | 7378 conf. 8/3          | 2016 | S. Veneziana        | S | I    | S    | S  | S   | S   | I    | I   | I    | R | R    | I   | R | R    | R   | I |
| 124 | 7378 conf. 8/4          | 2016 | S. Veneziana        | S | S    | S    | S  | S   | S   | S    | S   | I    | R | R    | I   | I | R    | R   | R |
| 125 | 114555 CONF. 4/ CAMP.10 | 2014 | S. Stoneferry       | S | n.t. | S    | S  | S   | S   | S    | S   | S    | S | S    | S   | S | R    | S   | S |
| 126 | 114555 CONF.5/ CAMP. 1  | 2014 | S. Juba             | S | n.t. | S    | S  | S   | S   | S    | S   | S    | S | S    | S   | S | R    | S   | I |
| 127 | 114555 CONF.5/ CAMP. 3  | 2014 | S. Juba             | S | n.t. | S    | S  | S   | S   | S    | S   | S    | S | S    | S   | S | R    | R   | S |
| 128 | 114555 CONF.5/ CAMP. 2  | 2014 | S. Arechavaleta     | S | n.t. | S    | S  | S   | S   | S    | S   | S    | S | S    | S   | S | R    | R   | S |
| 129 | 114555 CONF.5/ CAMP. 4  | 2014 | S. Arechavaleta     | S | n.t. | S    | S  | S   | S   | S    | S   | S    | S | S    | S   | S | R    | R   | S |
| 130 | 114555 CONF.8/ CAMP. 1  | 2014 | S. Gail             | S | S    | S    | S  | S   | S   | S    | S   | S    | S | S    | S   | S | R    | I   | S |

| n.  | Lab cod.                | YEAR | SUBTYPE or SEROTYPE       | A | AMC  | C | KF | CTX | CIP | CST  | CAZ | ENR  | G | K    | NAL  | S    | SSS  | SXT | T |
|-----|-------------------------|------|---------------------------|---|------|---|----|-----|-----|------|-----|------|---|------|------|------|------|-----|---|
| 132 | 114555 CONF.8/ CAMP. 4  | 2014 | S. Gail                   | S | S    | S | S  | S   | S   | S    | S   | S    | S | I    | S    | S    | R    | I   | S |
| 133 | 114555 CONF.8/ CAMP. 3  | 2014 | S. Gail                   | S | S    | S | S  | S   | S   | S    | S   | S    | I | I    | S    | S    | R    | I   | S |
| 134 | 114555 CONF.7/ CAMP. 2  | 2014 | S. Kiumenza               | S | n.t. | S | S  | I   | S   | S    | S   | S    | I | I    | S    | I    | R    | I   | I |
| 135 | 114555 CONF.7/ CAMP. 3  | 2014 | S. Kiumenza               | S | n.t. | S | S  | I   | S   | S    | S   | S    | I | I    | S    | I    | R    | I   | I |
| 136 | 114555 CONF.9/ CAMP. 1  | 2014 | S. Kiumenza               | S | S    | S | S  | I   | S   | S    | I   | S    | R | I    | S    | I    | R    | S   | I |
| 137 | 114555 CONF.9/ CAMP. 2  | 2014 | S. Kiumenza               | S | S    | S | S  | S   | S   | S    | S   | S    | S | I    | S    | S    | R    | I   | S |
| 138 | 114555 CONF.9/ CAMP. 3  | 2014 | S. Kiumenza               | S | S    | S | S  | S   | S   | S    | I   | S    | I | I    | S    | I    | R    | S   | S |
| 139 | 114555 CONF.9/ CAMP. 4  | 2014 | S. Kiumenza               | S | S    | S | S  | S   | S   | S    | I   | S    | I | I    | S    | S    | R    | S   | S |
| 140 | 114555 CONF.10/ CAMP.1  | 2014 | S. Banjul                 | S | S    | S | S  | S   | S   | S    | S   | S    | S | S    | S    | I    | R    | R   | S |
| 141 | 114555 CONF.10/ CAMP.2  | 2014 | S. Banjul                 | S | S    | S | S  | S   | S   | S    | S   | S    | S | S    | S    | S    | R    | R   | S |
| 142 | 114555 CONF.10/ CAMP.3  | 2014 | S. Banjul                 | S | S    | S | S  | S   | S   | S    | S   | S    | S | S    | S    | S    | R    | R   | S |
| 143 | 114555 CONF.10/ CAMP.4  | 2014 | S. Banjul                 | S | S    | S | S  | S   | S   | S    | S   | S    | S | S    | S    | S    | R    | R   | S |
| 144 | 92980                   | 2014 | S. Grampiam               | S | S    | S | I  | S   | S   | S    | S   | n.t. | S | n.t. | I    | I    | R    | I   | R |
| 145 | 2626                    | 2014 | S. Ablogame               | S | S    | S | S  | S   | S   | S    | S   | S    | S | S    | S    | I    | R    | S   | S |
| 146 | 1242                    | 2014 | S. Massakory              | S | S    | S | S  | S   | S   | S    | S   | S    | S | S    | n.t. | S    | R    | S   | S |
| 147 | 104841 CONF.2/ CAMP.1-2 | 2015 | S. Biespebjerg            | S | I    | S | I  | S   | S   | S    | S   | S    | S | I    | I    | S    | R    | S   | I |
| 148 | 7378 conf. 2/3          | 2016 | S. Canada                 | R | S    | S | S  | S   | S   | S    | S   | S    | S | I    | S    | S    | R    | R   | R |
| 149 | 7378 conf. 3/4          | 2016 | S. Canada                 | S | S    | S | S  | S   | S   | S    | S   | S    | S | I    | S    | I    | R    | R   | R |
| 150 | 7378 conf. 3/5          | 2016 | S. Canada                 | S | S    | S | S  | S   | S   | S    | S   | S    | S | I    | S    | S    | R    | R   | R |
| 151 | 7378 conf. 3/6          | 2016 | S. Canada                 | S | S    | S | S  | S   | S   | S    | S   | S    | S | I    | S    | I    | R    | I   | R |
| 152 | 7378 conf.4/2           | 2016 | S. Canada                 | S | S    | S | I  | I   | S   | S    | S   | S    | S | I    | S    | S    | R    | S   | R |
| 153 | 7378 conf. 5/4          | 2016 | S. Canada                 | S | S    | S | I  | S   | S   | S    | S   | S    | I | I    | S    | I    | R    | R   | I |
| 154 | 7378 conf. 5/5          | 2016 | S. Canada                 | S | S    | S | S  | S   | S   | S    | S   | S    | I | I    | S    | S    | R    | R   | R |
| 155 | 7378 conf. 6/2          | 2016 | S. Canada                 | S | S    | S | I  | S   | S   | S    | S   | n.t. | S | I    | S    | S    | n.t. | R   | S |
| 156 | 7378 conf. 8/1          | 2016 | S. Bahrenfeld             | S | S    | S | S  | I   | I   | S    | S   | I    | R | R    | I    | I    | R    | R   | R |
| 157 | 89320 CONF.5/CAMP. 2    | 2013 | S. Umbilo                 | R | S    | S | S  | S   | S   | S    | I   | S    | S | I    | S    | S    | R    | I   | R |
| 158 | 85502                   | 2013 | S. enterica subs. salamae | R | S    | S | I  | S   | S   | S    | I   | S    | S | I    | I    | I    | R    | S   | S |
| 159 | 103877                  | 2013 | S. enterica subs. salamae | S | S    | S | S  | S   | S   | S    | S   | S    | S | S    | S    | S    | R    | S   | S |
| 160 | 91498                   | 2013 | S. enterica subs. salamae | R | R    | R | R  | S   | S   | n.t. | I   | S    | S | S    | n.t. | n.t. | R    | R   | R |
| 161 | 89320 CONF.5/CAMP. 1    | 2013 | S. enterica subs. salamae | R | S    | S | I  | S   | S   | S    | I   | S    | S | S    | S    | S    | R    | S   | S |
| 162 | 114555 CONF.2/ CAMP. 2  | 2014 | S. enterica subs. salamae | S | S    | S | S  | S   | S   | S    | S   | S    | S | S    | S    | S    | R    | S   | S |
| 163 | 114555 CONF.2/ CAMP. 3  | 2014 | S. enterica subs. salamae | S | I    | S | S  | S   | S   | S    | S   | S    | S | S    | S    | S    | R    | S   | S |

[illegible]

| n.  | Lab cod.            | YEAR | SUBTYPE or SEROTYPE          | A | AMC  | C    | KF | CTX | CIP | CST  | CAZ  | ENR  | G | K | NAL  | S | SSS  | SXT | T |
|-----|---------------------|------|------------------------------|---|------|------|----|-----|-----|------|------|------|---|---|------|---|------|-----|---|
| 198 | 114165              | 2014 | S. enterica subs. salamae    | S | S    | S    | S  | S   | S   | S    | n.t. | n.t. | S | I | S    | S | R    | S   | S |
| 199 | 108976              | 2014 | S. enterica subs. salamae    | S | S    | S    | S  | S   | S   | S    | S    | n.t. | S | S | S    | S | S    | S   | S |
| 200 | 108979              | 2014 | S. enterica subs. salamae    | S | S    | S    | S  | S   | S   | S    | S    | n.t. | S | S | S    | S | R    | S   | S |
| 201 | 2041                | 2015 | S. enterica subs. salamae    | S | I    | S    | I  | S   | S   | S    | I    | n.t. | S | S | S    | S | R    | I   | S |
| 202 | 2045                | 2015 | S. enterica subs. salamae    | S | S    | S    | S  | S   | S   | S    | S    | n.t. | S | S | S    | I | R    | I   | I |
| 203 | 2146                | 2015 | S. enterica subs. salamae    | S | S    | S    | S  | S   | S   | S    | I    | n.t. | S | I | S    | I | R    | I   | I |
| 204 | 2147                | 2015 | S. enterica subs. salamae    | S | I    | S    | S  | S   | S   | S    | I    | n.t. | S | I | S    | S | R    | I   | S |
| 205 | 7378 conf. 2 /1     | 2016 | S. enterica subs. salamae    | S | S    | S    | S  | S   | S   | S    | S    | S    | S | I | S    | S | R    | R   | R |
| 206 | 7378 conf. 2/4      | 2016 | S. enterica subs. salamae    | S | S    | S    | S  | S   | S   | S    | S    | S    | S | I | S    | S | R    | R   | R |
| 207 | 7378 conf. 6/1      | 2016 | S. enterica subs. salamae    | R | I    | S    | R  | S   | S   | S    | S    | S    | S | I | S    | R | R    | R   | R |
| 208 | 7378 conf. 8/2      | 2016 | S. enterica subs. salamae    | S | S    | S    | I  | S   | S   | S    | S    | I    | R | R | S    | R | R    | I   | I |
| 209 | 7378 conf. 9/1      | 2016 | S. enterica subs. salamae    | S | S    | S    | I  | S   | I   | I    | I    | R    | R | R | I    | I | R    | R   | I |
| 210 | 7378 conf. 9/2      | 2016 | S. enterica subs. salamae    | S | S    | S    | S  | S   | S   | S    | S    | I    | R | R | I    | I | R    | R   | R |
| 211 | 114555 CONF.2/1     | 2014 | S. enterica subs. arizonae   | S | n.t. | S    | S  | S   | S   | S    | S    | S    | S | S | S    | S | R    | R   | S |
| 212 | 114555 CONF.2/8     | 2014 | S. enterica subs. arizonae   | S | n.t. | S    | S  | S   | S   | S    | S    | S    | S | I | S    | I | R    | S   | S |
| 213 | 114555 CONF. 4/5    | 2014 | S. enterica subs. arizonae   | S | n.t. | S    | S  | S   | S   | S    | S    | S    | I | I | S    | I | R    | I   | S |
| 214 | 114555 CONF. 4/6    | 2014 | S. enterica subs. arizonae   | S | n.t. | S    | S  | S   | S   | S    | S    | S    | S | I | S    | I | R    | I   | S |
| 215 | 110305 CONF.6/1     | 2014 | S. enterica subs. arizonae   | S | S    | S    | S  | S   | S   | S    | S    | S    | S | S | S    | R | R    | S   | S |
| 216 | 110305 CONF.6/2     | 2014 | S. enterica subs. arizonae   | S | S    | S    | S  | S   | S   | S    | n.t. | n.t. | S | S | S    | R | R    | S   | S |
| 217 | 110310              | 2014 | S. enterica subs. arizonae   | S | S    | S    | S  | S   | S   | S    | n.t. | n.t. | S | I | S    | I | R    | S   | S |
| 218 | 110311              | 2014 | S. enterica subs. arizonae   | S | S    | S    | S  | S   | S   | S    | n.t. | n.t. | S | I | S    | I | R    | S   | S |
| 219 | 110363              | 2014 | S. enterica subs. arizonae   | S | S    | S    | S  | S   | S   | S    | n.t. | n.t. | S | S | S    | S | R    | S   | S |
| 220 | 111718 CONF.4/1-2-3 | 2014 | S. enterica subs. arizonae   | S | S    | S    | S  | S   | S   | S    | n.t. | n.t. | S | I | S    | I | R    | S   | S |
| 221 | 7378 conf. 6/3      | 2016 | S. enterica subs. arizonae   | I | I    | S    | I  | S   | S   | S    | S    | S    | S | S | S    | I | n.t. | R   | R |
| 222 | 7378 conf. 7/1      | 2016 | S. enterica subs. arizonae   | S | S    | S    | I  | S   | S   | S    | S    | S    | S | I | S    | I | n.t. | R   | I |
| 223 | 87962 conf.4/1      | 2013 | S. enterica subs. diarizonae | S | S    | S    | S  | S   | S   | S    | S    | S    | S | S | S    | I | R    | R   | S |
| 224 | 87962 CONF.4/2      | 2013 | S. enterica subs. diarizonae | R | S    | S    | I  | S   | S   | S    | I    | I    | S | I | I    | I | R    | S   | I |
| 225 | 91737 CONF.4/5      | 2013 | S. enterica subs. diarizonae | I | S    | S    | I  | I   | S   | S    | I    | S    | S | R | n.t. | R | R    | S   | I |
| 226 | 91737 CONF.4/7      | 2013 | S. enterica subs. diarizonae | I | S    | S    | I  | I   | S   | S    | I    | S    | S | I | R    | R | R    | S   | I |
| 227 | 90718               | 2013 | S. enterica subs. diarizonae | S | S    | S    | S  | S   | S   | n.t. | S    | S    | S | I | S    | R | R    | R   | I |
| 228 | 103705              | 2013 | S. enterica subs. diarizonae | S | S    | n.t. | S  | S   | S   | S    | S    | S    | S | S | S    | I | R    | S   | S |
| 229 | 87963 CONF.5/1      | 2013 | S. enterica subs. diarizonae | S | S    | S    | S  | S   | S   | S    | S    | S    | I | I | S    | R | R    | S   | S |

| n.  | Lab cod.           | YEAR | SUBTYPE or SEROTYPE          | A | AMC  | C    | KF | CTX  | CIP | CST  | CAZ  | ENR  | G | K    | NAL  | S    | SSS  | SXT | T |
|-----|--------------------|------|------------------------------|---|------|------|----|------|-----|------|------|------|---|------|------|------|------|-----|---|
| 231 | 103373             | 2013 | S. enterica subs. diarizonae | S | S    | S    | S  | I    | S   | S    | I    | S    | S | I    | S    | R    | R    | I   | I |
| 232 | 91506              | 2013 | S. enterica subs. diarizonae | S | I    | S    | R  | n.t. | S   | S    | I    | S    | S | I    | S    | n.t. | R    | S   | S |
| 233 | 113172             | 2013 | S. enterica subs. diarizonae | S | S    | S    | S  | S    | S   | n.t. | S    | n.t. | S | S    | S    | I    | n.t. | S   | S |
| 234 | 114555 CONF. 3/14  | 2014 | S. enterica subs. diarizonae | S | n.t. | S    | S  | S    | S   | S    | S    | S    | S | I    | I    | S    | R    | S   | S |
| 235 | 114555 CONF. 4/7   | 2014 | S. enterica subs. diarizonae | S | n.t. | S    | S  | S    | S   | S    | S    | S    | S | S    | S    | I    | R    | S   | S |
| 236 | 114555 CONF.6/3    | 2014 | S. enterica subs. diarizonae | S | n.t. | S    | S  | S    | S   | S    | S    | S    | S | S    | S    | I    | R    | R   | S |
| 237 | 92885 CONF.4/2     | 2014 | S. enterica subs. diarizonae | S | I    | S    | S  | S    | S   | S    | I    | n.t. | S | n.t. | n.t. | R    | R    | R   | R |
| 238 | 92885 CONF.4/3     | 2014 | S. enterica subs. diarizonae | S | S    | S    | S  | S    | S   | S    | S    | n.t. | S | n.t. | S    | I    | R    | S   | S |
| 239 | 2682               | 2014 | S. enterica subs. diarizonae | S | S    | S    | S  | S    | S   | S    | S    | S    | S | S    | S    | I    | R    | S   | S |
| 240 | 2630               | 2014 | S. enterica subs. diarizonae | S | I    | S    | S  | S    | S   | S    | S    | S    | S | S    | S    | I    | R    | S   | S |
| 241 | 2682               | 2014 | S. enterica subs. diarizonae | S | S    | S    | S  | S    | S   | S    | S    | S    | S | S    | S    | I    | R    | S   | S |
| 242 | 110293             | 2014 | S. enterica subs. diarizonae | S | S    | S    | S  | S    | S   | S    | n.t. | n.t. | S | S    | S    | I    | R    | S   | S |
| 243 | 103803             | 2014 | S. enterica subs. diarizonae | S | S    | S    | S  | S    | S   | S    | S    | n.t. | S | S    | S    | I    | R    | S   | S |
| 244 | 105516             | 2014 | S. enterica subs. diarizonae | S | S    | S    | S  | S    | S   | S    | S    | n.t. | S | S    | S    | S    | R    | S   | S |
| 245 | 90257              | 2015 | S. enterica subs. diarizonae | I | S    | S    | S  | S    | S   | S    | I    | S    | S | I    | S    | I    | R    | I   | R |
| 246 | 93057 CONF.1/1-2-3 | 2015 | S. enterica subs. diarizonae | I | S    | S    | S  | S    | S   | S    | I    | n.t. | S | I    | S    | I    | R    | I   | S |
| 247 | 1633 CONF.4/1      | 2016 | S. enterica subs. diarizonae | S | I    | n.t. | I  | S    | S   | S    | S    | S    | S | I    | S    | S    | R    | R   | R |
| 248 | 79113              | 2016 | S. enterica subs. diarizonae | I | S    | S    | S  | S    | S   | S    | S    | I    | I | I    | S    | R    | R    | S   | R |
| 249 | 7378 conf. 5/1     | 2016 | S. enterica subs. diarizonae | S | S    | S    | S  | S    | S   | S    | S    | S    | S | I    | S    | S    | R    | R   | I |
| 250 | 7378 conf. 5/2     | 2016 | S. enterica subs. diarizonae | S | S    | S    | S  | S    | S   | S    | S    | S    | I | R    | S    | I    | S    | R   | I |
| 251 | 7378 conf. 5/3     | 2016 | S. enterica subs. diarizonae | S | I    | S    | I  | S    | S   | S    | S    | S    | S | I    | S    | S    | n.t. | R   | I |
| 252 | 7378 conf. 7/2     | 2016 | S. enterica subs. diarizonae | S | S    | S    | I  | S    | S   | S    | S    | S    | S | I    | S    | R    | n.t. | R   | R |
| 253 | 90049              | 2013 | S. enterica subs. houtenae   | S | S    | S    | S  | S    | S   | n.t. | S    | S    | S | I    | S    | I    | R    | R   | I |
| 254 | 111438             | 2013 | S. enterica subs. houtenae   | I | S    | S    | S  | S    | S   | S    | S    | S    | S | I    | S    | I    | R    | S   | S |
| 255 | 111424 CONF.6/1    | 2013 | S. enterica subs. houtenae   | S | S    | n.t. | S  | S    | S   | S    | I    | S    | S | R    | S    | I    | R    | S   | S |
| 256 | 111424 CONF.6/2    | 2013 | S. enterica subs. houtenae   | S | S    | n.t. | S  | S    | S   | S    | I    | S    | S | R    | S    | I    | R    | S   | S |
| 257 | 92902              | 2013 | S. enterica subs. houtenae   | S | S    | S    | S  | S    | S   | n.t. | S    | S    | S | I    | S    | I    | R    | S   | S |
| 258 | 93493              | 2013 | S. enterica subs. houtenae   | S | S    | S    | S  | S    | S   | n.t. | S    | S    | S | S    | S    | I    | R    | S   | S |
| 259 | 114555 CONF. 4/1   | 2014 | S. enterica subs. houtenae   | S | n.t. | S    | S  | S    | S   | S    | S    | S    | S | S    | S    | I    | R    | S   | S |
| 260 | 114555 CONF.11/1   | 2014 | S. enterica subs. indica     | S | S    | S    | S  | S    | S   | S    | S    | S    | S | S    | S    | S    | R    | I   | S |

\*n.t: sample not tested against the molecule
